# Supplementary material for: High throughput plasma N-glycome profiling using multiplexed labelling and UPLC with fluorescence detection
Source: Royal Society of Chemistry journal article supplement (doi:10.1039/c1an15684e), 2011-01-01

---

# High Throughput Plasma N-Glycome Profiling using Multiplexed Labelling and UPLC with Fluorescence Detection.

Ana Knežević, Jonathan Bones, Stjepan Krešimir Kračun, Olga Gornik, Pauline M. Rudd and Gordan Lauc

---

## Supplementary Information

Figure S1: Normalised overlay for the separation of aniline labelled malto-oligomers across all three detection channels.

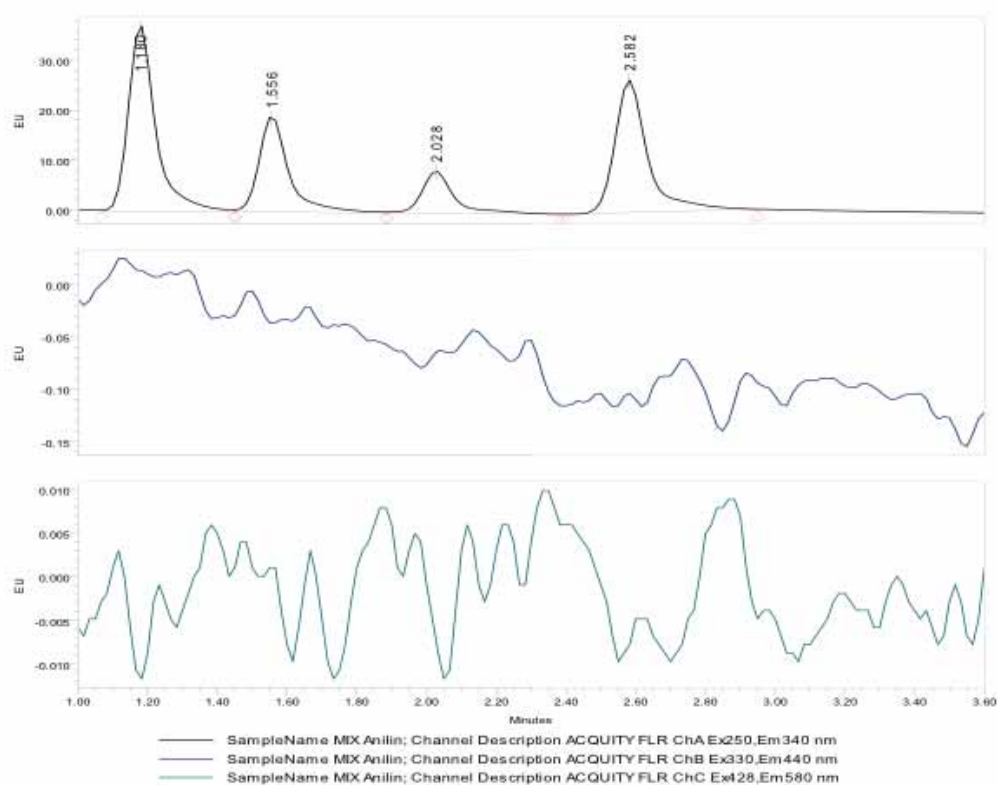

Figure S2: Normalised overlay for the separation of 2-aminobenzamide labelled malto-oligomers across all three detection channels.

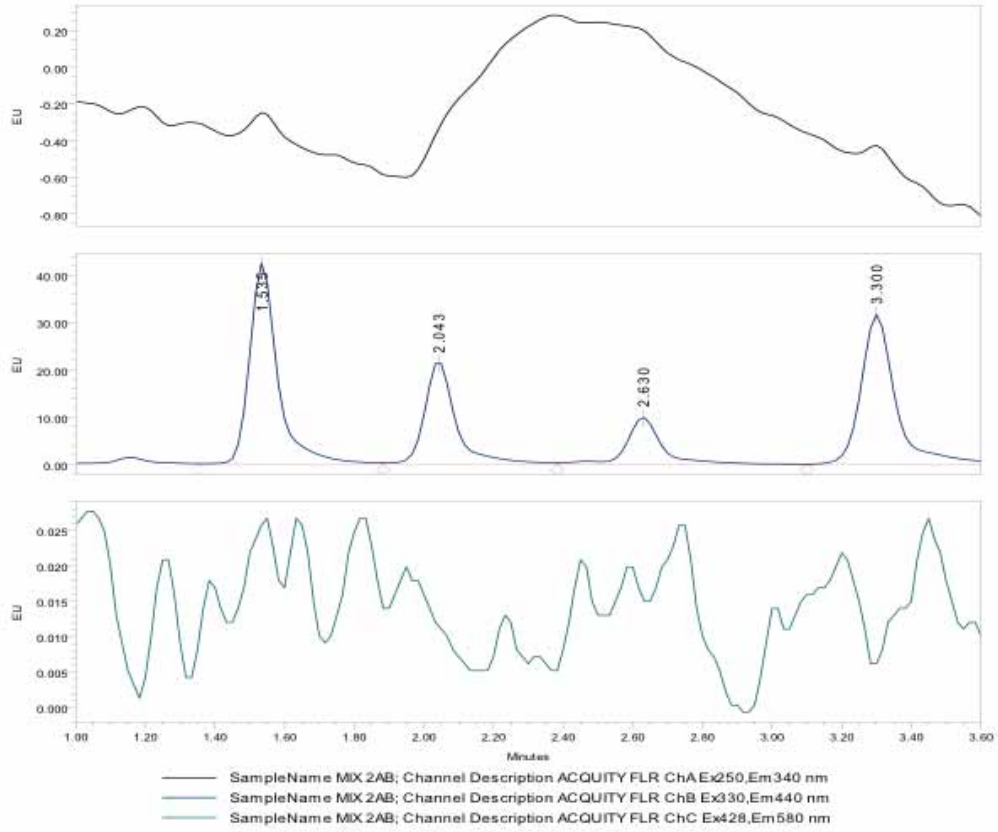

Figure S3: Normalised overlay for the separation of 2-aminoacridone labelled malto-oligomers across all three detection channels.

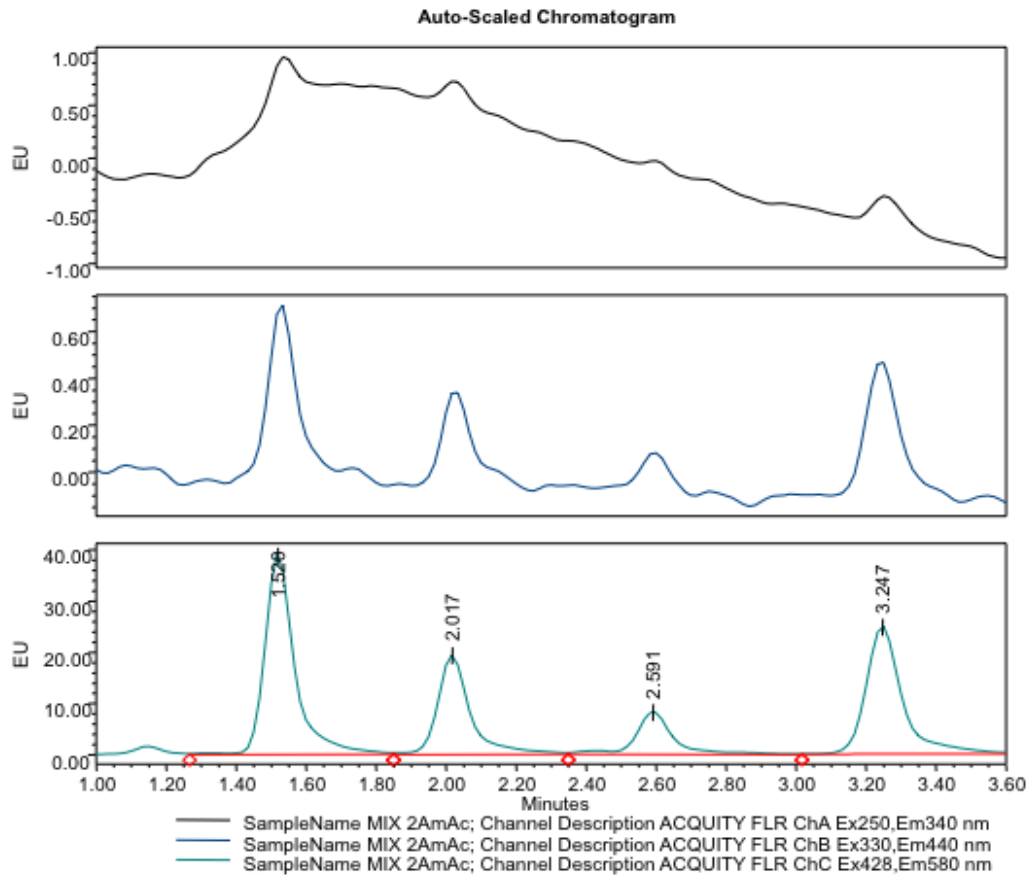

Supplement: c1an15684e.pdf [file c1an15684e.pdf]
